# Supplementary material for: Assembling of Bi atoms on TiO2 nanorods boosts photoelectrochemical water splitting of semiconductors
Source: Royal Society of Chemistry journal article supplement (doi:10.1039/d0nr00004c), 2020-01-01
Supplement: d0nr00004c1.pdf [file d0nr00004c1.pdf]

*Supplementary Information for*

**Assembling of Bi Atoms on TiO<sub>2</sub> Nanorods Boosts Photoelectrochemical  
Water Splitting of Semiconductor**

Yajun Pang<sup>a, b, †</sup>, Wenjie Zang<sup>b, †</sup>, Zongkui Kou<sup>b, \*</sup>, Lei Zhang<sup>b</sup>, Guangqing Xu<sup>a, c, \*</sup>, Jun Lv<sup>a, c</sup>,  
Xiaorui Gao<sup>b</sup>, Zhenghui Pan<sup>b</sup>, John Wang<sup>b, \*</sup>, Yucheng Wu<sup>a, c</sup>

<sup>a</sup> School of Materials Science and Engineering, and Key Laboratory of Advanced Functional Materials and Devices of Anhui Province, Hefei University of Technology, Hefei 230009, China.

<sup>b</sup> Department of Materials Science and Engineering, National University of Singapore, Singapore 117574, Singapore.

<sup>c</sup> China International S&T Cooperation Base for Advanced Energy and Environmental Materials, Hefei 230009, China

\*Corresponding authors

E-mail: msekz@nus.edu.sg (Z. Kou); gqxu1979@hfut.edu.cn (G. Xu); msewangj@nus.edu.sg (J. Wang).

<sup>†</sup>These authors contributed equally to this work.

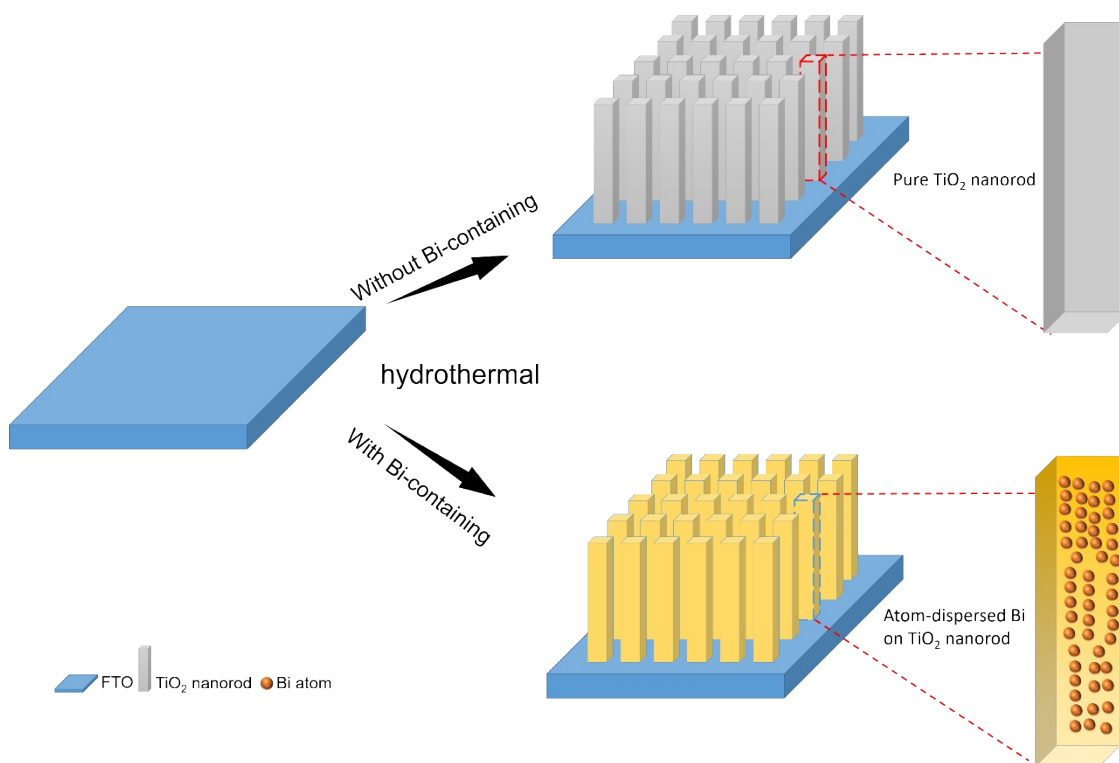

**Figure S1.** Schematic showing the formation of pure TiO<sub>2</sub> and atom-dispersed Bi on TiO<sub>2</sub> nanorods.

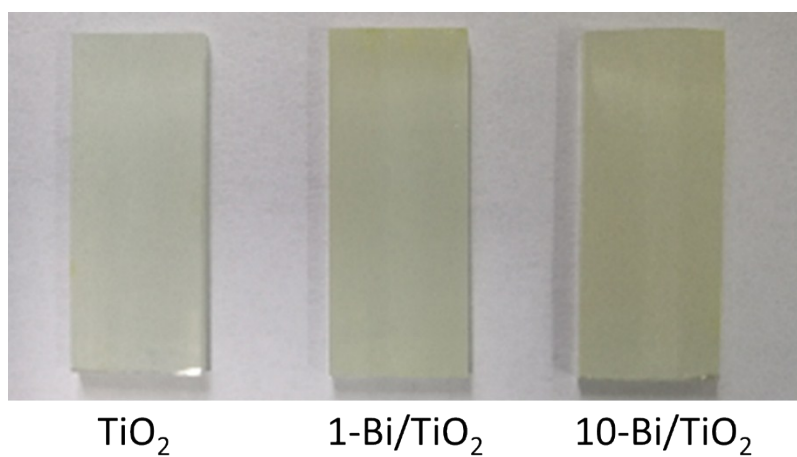

**Figure S2.** Optical photos of TiO<sub>2</sub>, 1-Bi/TiO<sub>2</sub>, and 10-Bi/TiO<sub>2</sub>.

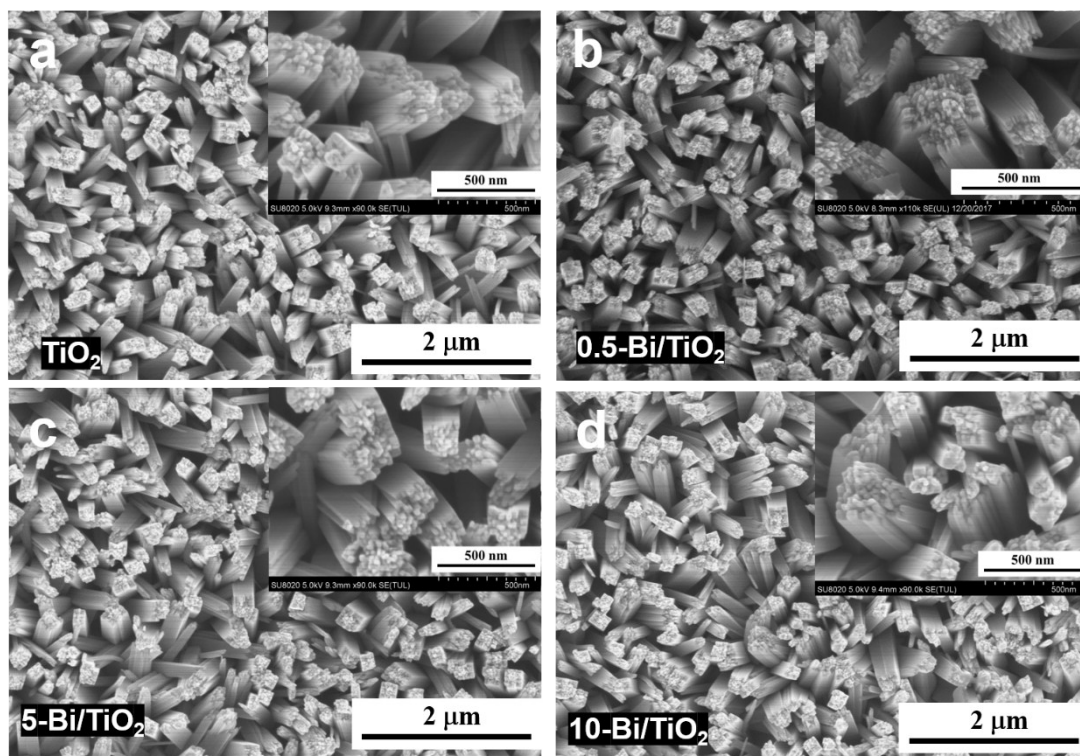

**Figure S3.** Additional SEM images as-prepared (a)  $\text{TiO}_2$ , (b)  $0.5\text{-Bi/TiO}_2$ , (c)  $5\text{-Bi/TiO}_2$ , and (d)  $10\text{-Bi/TiO}_2$ , respectively.

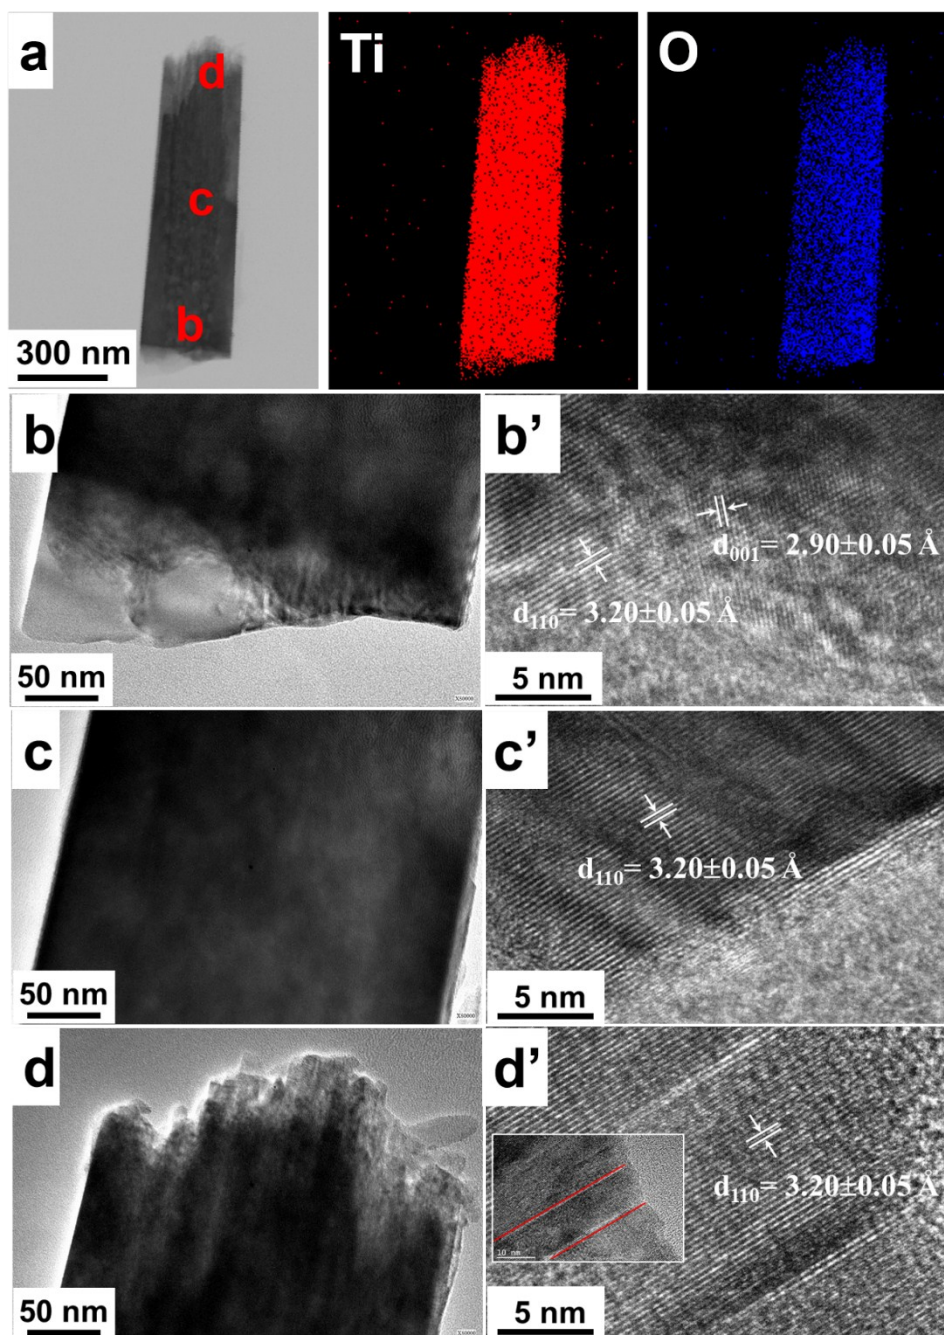

**Figure S4.** (a) TEM image and corresponding elemental mappings of Ti, and O in Bi/TiO<sub>2</sub> nanorods; (b-d) additional HR-TEM images of Bi/TiO<sub>2</sub> sample.

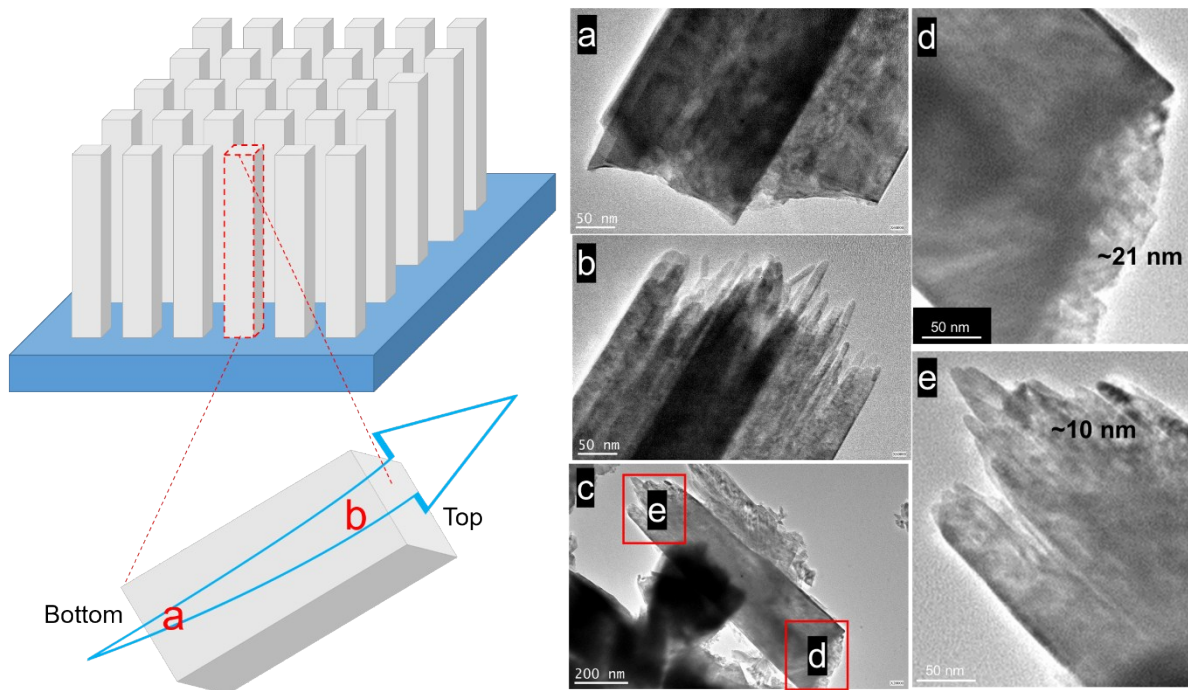

**Figure S5.** Schematic diagram and HR-TEM images of pristine  $\text{TiO}_2$  for understanding gradient distribution for  $\text{Bi/TiO}_2$ .

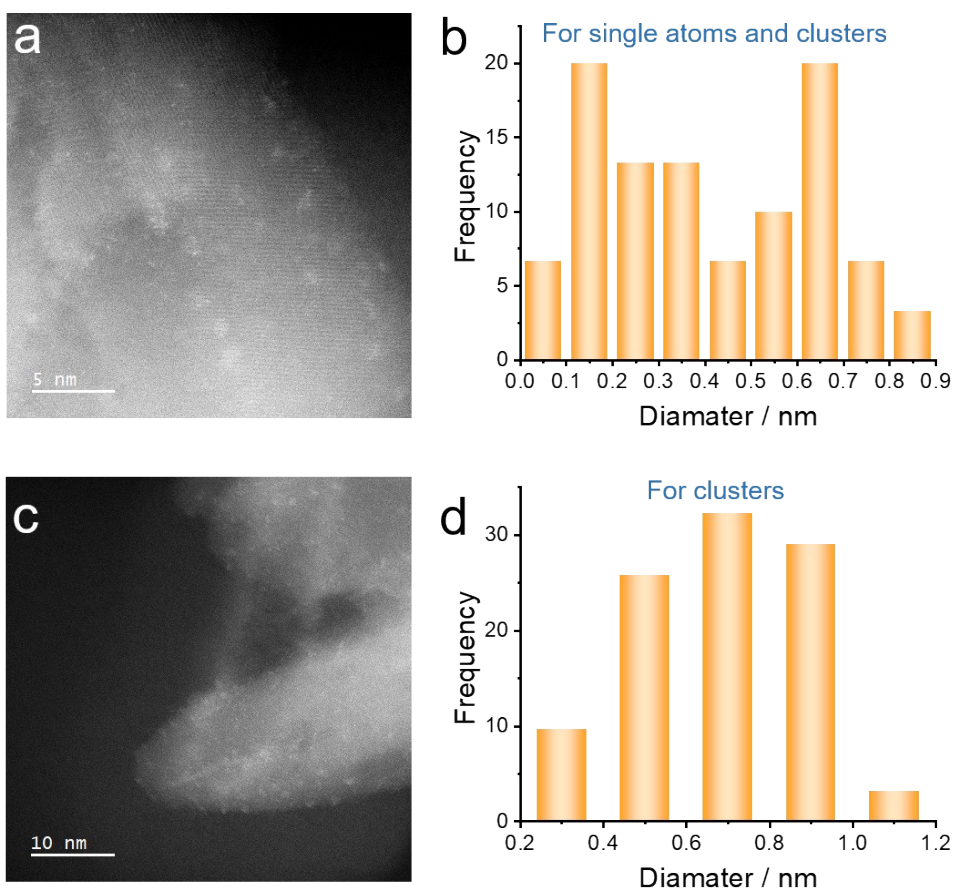

**Figure S6.** Size distribution of Bi atoms and cluster on Bi/TiO<sub>2</sub> NRs.

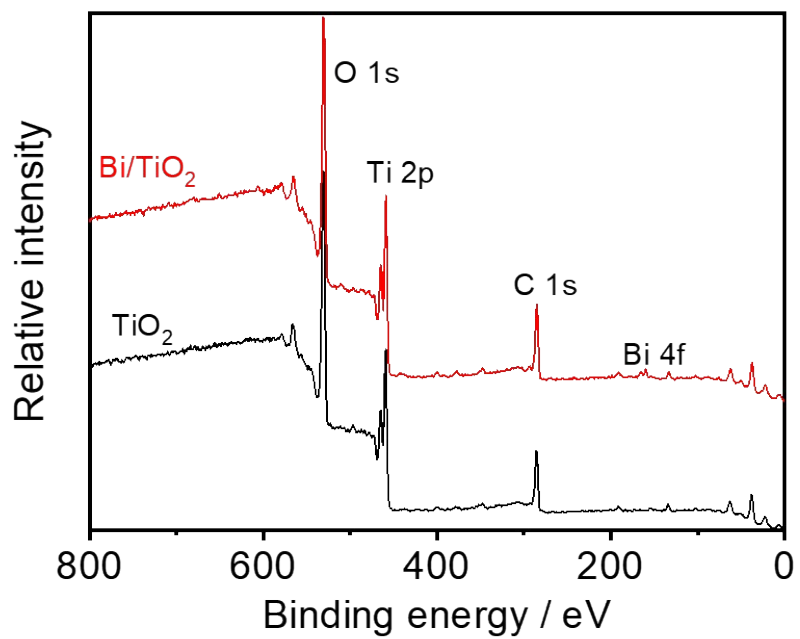

**Figure S7.** Broad scan XPS patterns of TiO<sub>2</sub> and 1-Bi-TiO<sub>2</sub>.

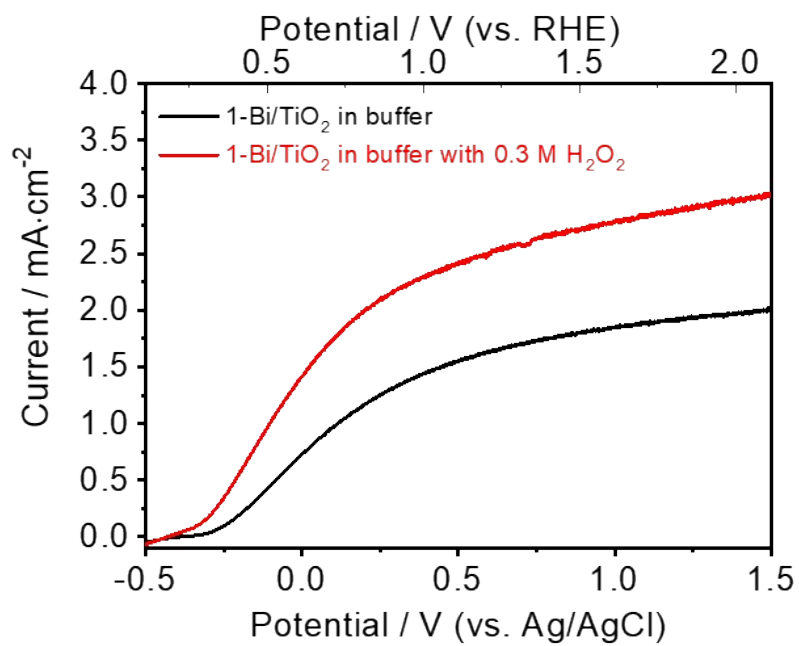

**Figure S8.** Linear sweep voltammogram (LSV) measurements of 1-Bi/TiO<sub>2</sub> NRs electrode in buffer solution without and with 0.3 M H<sub>2</sub>O<sub>2</sub>.



**Table S1.** A comparison study between this work and previously reported active TiO<sub>2</sub> NRs-based photoanodes toward PEC water splitting.

| Photoanode material                                             | Current intensity                                     | Reference |
|-----------------------------------------------------------------|-------------------------------------------------------|-----------|
| TiO <sub>2</sub> nanorod@nanobowl arrays                        | 1.24 mA cm <sup>-2</sup><br>at 1.23 V <sub>RHE</sub>  | [1]       |
| Au/TiO <sub>2</sub> NR photonic crystals                        | 1.65 mA cm <sup>-2</sup><br>at 1.23 V <sub>RHE</sub>  | [2]       |
| TiO <sub>2</sub> /BTO core/shell nanowire                       | 1.30 mA cm <sup>-2</sup><br>at 1.23 V <sub>RHE</sub>  | [3]       |
| TiO <sub>2</sub> /CdS/Co-Pi nanowire array                      | 0.78 mA cm <sup>-2</sup><br>at 0 V <sub>Ag/AgCl</sub> | [4]       |
| TiO <sub>2</sub> -STO core-shell nanowire                       | 1.43 mA cm <sup>-2</sup><br>at 1.23 V <sub>RHE</sub>  | [5]       |
| A-V-Si: TiO <sub>2</sub> nanorod                                | 0.83 mA cm <sup>-2</sup><br>at 1.23 V <sub>RHE</sub>  | [6]       |
| C/N-TiO <sub>2</sub>                                            | ~1 mA cm <sup>-2</sup><br>at 1.23 V <sub>RHE</sub>    | [7]       |
| TiO <sub>2</sub> @Ta <sub>2</sub> O <sub>x</sub> N <sub>y</sub> | 1.32 mA cm <sup>-2</sup><br>at 1.23 V <sub>RHE</sub>  | [8]       |
| NH <sub>2</sub> -MIL-125(Ti)/TiO <sub>2</sub> nanorod           | 1.63 mA cm <sup>-2</sup><br>at 1.23 V <sub>RHE</sub>  | [9]       |
| BiFeO <sub>3</sub> /Sn:TiO <sub>2</sub> nanorod                 | ~1.5 mA cm <sup>-2</sup><br>at 1.23 V <sub>RHE</sub>  | [10]      |
| TNCuPc/TiO <sub>2</sub>                                         | ~1.10 mA cm <sup>-2</sup><br>at 1.23 V <sub>RHE</sub> | [11]      |
| Bi/TiO <sub>2</sub> nanorod                                     | 1.65 mA cm <sup>-2</sup><br>at 1.23 V <sub>RHE</sub>  | This work |

## References

- [1] W. Wang, J. Dong, X. Ye, Y. Li, Y. Ma and L. Qi, *Small* 2016, **12**, 1469.
- [2] X. Zhang, Y. Liu, S. T. Lee, S. Yang and Z. Kang, *Energy Environ. Sci.* 2014, **7**, 1409.
- [3] W. Yang, Y. Yu, M. B. Starr, X. Yin, Z. Li, A. Kvit, S. Wang, P. Zhao and X. Wang, *Nano Lett.* 2015, **15**, 7574.
- [4] G. Ai, H. Li, S. Liu, R. Mo and J. Zhong, *Adv. Funct. Mater.* 2015, **25**, 5706.
- [5] F. Wu, Y. Yu, H. Yang, L. N. German, Z. Li, J. Chen, W. Yang, L. Huang, W. Shi, L. Wang and X. Wang, *Adv. Mater.* 2017, **29**, 1701432.
- [6] C. Chen, Y. Wei, G. Yuan, Q. Liu, R. Lu, X. Huang, Y. Cao and P. Zhu, *Adv. Funct. Mater.* 2017, **27**, 1701575.
- [7] X. Song, W. Li, D. He, H. Wu, Z. Ke, C. Jiang, G. Wang and X. Xiao, *Adv. Energy Mater.* 2018, **8**, 1800165.
- [8] H. Zhang, L. Ma, J. Ming, B. Liu, Y. Zhao, Y. Hou, Z. Ding, C. Xu, Z. Zhang and J. Long, *Appl. Catal., B* 2019, **243**, 481.
- [9] J. Yoon, D. Kim, J. Kim, H. Jang and J. Lee, *Appl. Catal., B* 2019, **244**, 511.
- [10] J. Huang, Y. Wang, X. Liu, Y. Li, X. Hu, B. He, Z. Shu, Z. Li and Y. Zhao, *Nano Energy* 2019, **59**, 33.
- [11] X. Li, T. Zhang, Y. Chen, Y. Fu, J. Su and L. Guo, *Chem. Eng. J.* 2020, **382**, 122783.
